# Supplementary material
Source: publisher figshare collection journal article supplement (https://acs.figshare.com/ndownloader/files/3991912)
Supplement: Supplementary file 1 [file 3991912]

## **Supporting Information**

**Chemically modified graphene oxide-wrapped quasi-micro**

**Ag decorated silver trimolybdate nanowires for**

**photocatalytic applications**

**Kan Zhang <sup>a</sup>, Nansra Heo <sup>b</sup>, Xinjian Shi <sup>b</sup>, Jong Hyeok Park <sup>a,b\*</sup>**

<sup>a</sup> *SKKU Advanced Institute of Nanotechnology (SAINT), Sungkyunkwan University, Suwon 440-746, Republic of Korea*

<sup>b</sup> *School of Chemical Engineering, Sungkyunkwan University, Suwon 440-746, Republic of Korea*

---

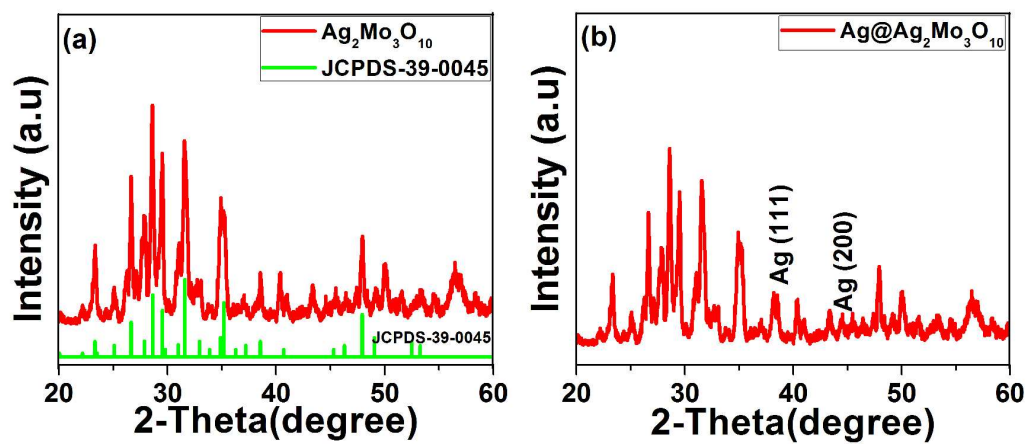

**Fig. S1.** XRD patterns of the  $\text{Ag}_2\text{Mo}_3\text{O}_{10}$  Ws (a) and  $\text{Ag}@\text{Ag}_2\text{Mo}_3\text{O}_{10}$  Ws (b).

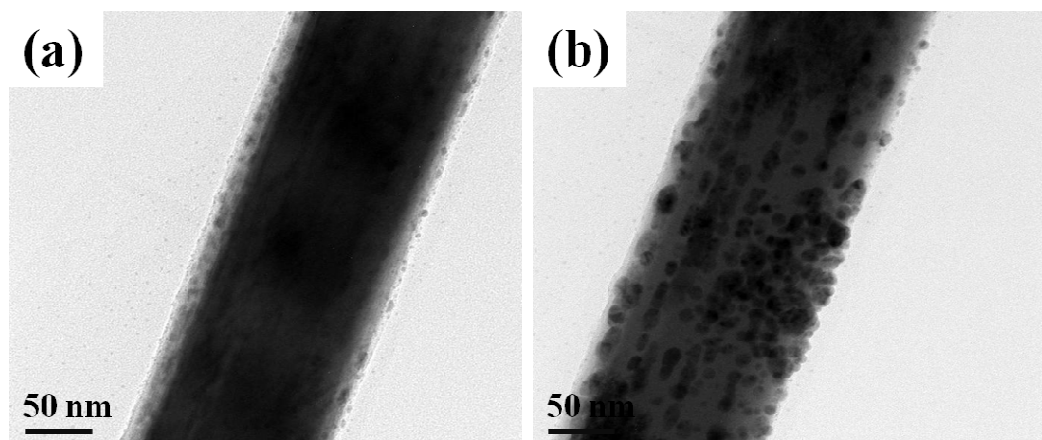

**Fig. S2.** TEM images of the  $\text{Ag}_2\text{Mo}_3\text{O}_{10}$  Ws (a) and  $\text{Ag}@\text{Ag}_2\text{Mo}_3\text{O}_{10}$  Ws (b).

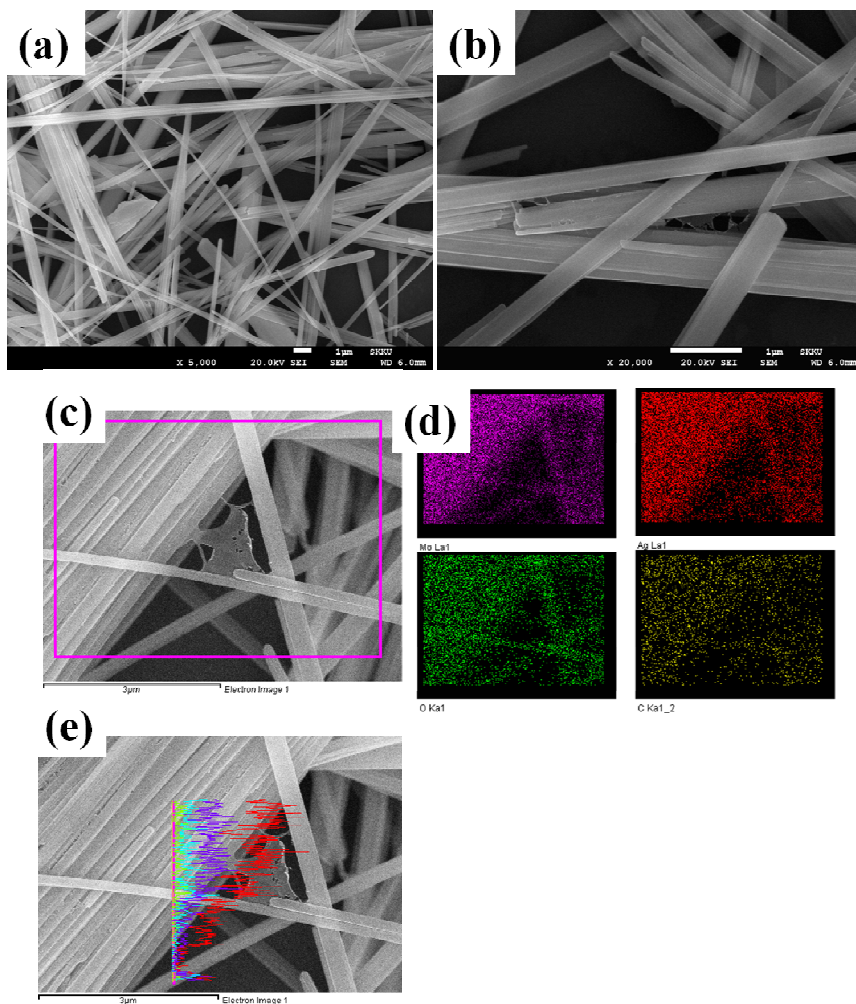

**Fig. S3.** SEM images of the Ag@Ag<sub>2</sub>Mo<sub>3</sub>O<sub>10</sub>/GO (a) and (b), element mapping (c) and (d), and EDS line analysis (e).

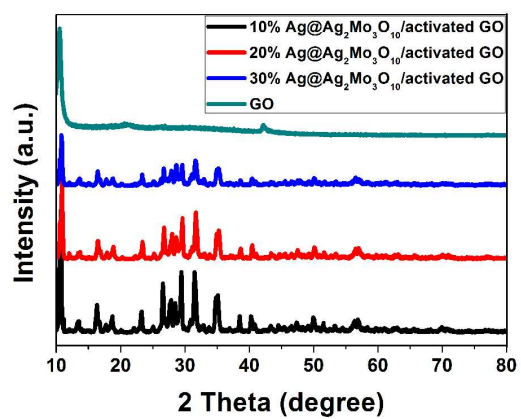

**Fig. S4.** XRD patterns of the GO and Ag@Ag<sub>2</sub>Mo<sub>3</sub>O<sub>10</sub>/activated GO composite.

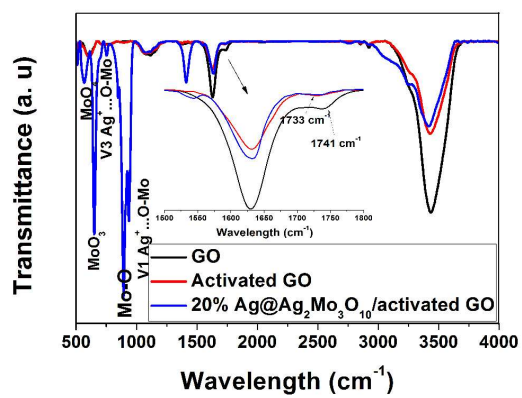

**Fig. S5.** FT-IR spectra of the GO, activated GO and 20% Ag@Ag<sub>2</sub>Mo<sub>3</sub>O<sub>10</sub>/activated GO composite. Inset is magnification of the peaks from 1500 to 1800 cm<sup>-1</sup>.

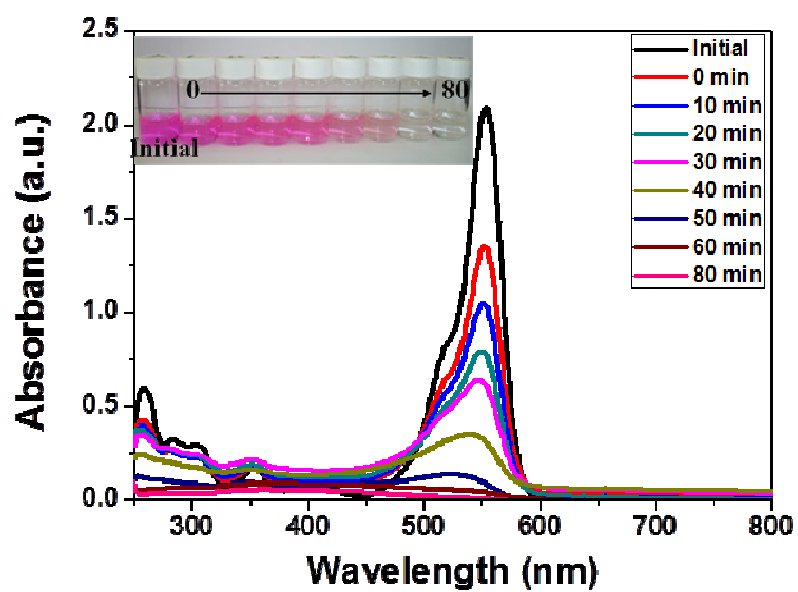

**Fig. S6.** UV-vis absorption spectra change of Rh.B concentration against the 20%  $\text{Ag@Ag}_2\text{Mo}_3\text{O}_{10}$ /activated GO composite under solar light (Insets show the fade of the Rh.B)

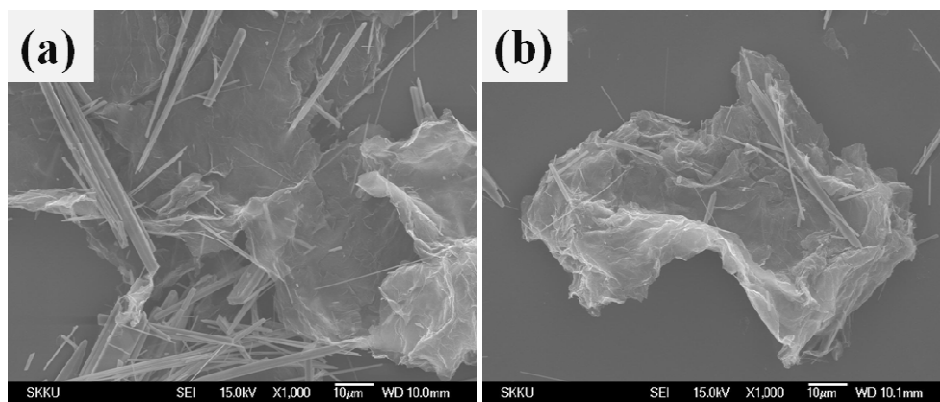

**Fig. S7.** SEM images of the Ag@Ag<sub>2</sub>Mo<sub>3</sub>O<sub>10</sub>/RGO.



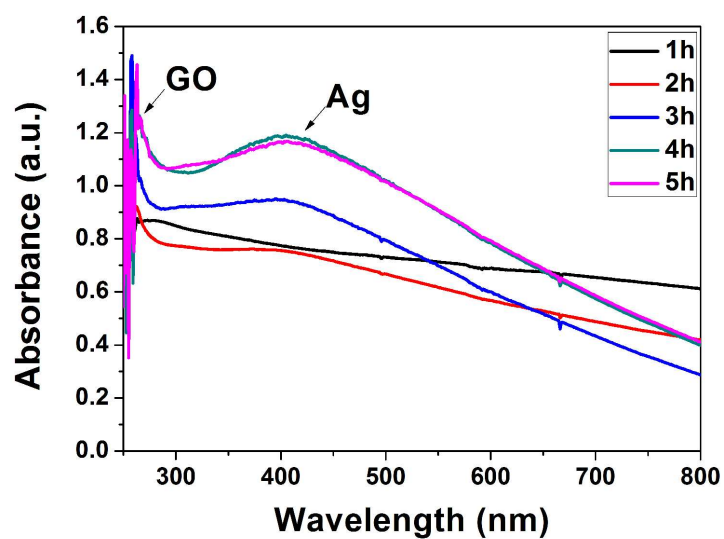

**Fig. S8.** UV absorption spectra of Ag@Ag<sub>2</sub>Mo<sub>3</sub>O<sub>10</sub>/activated GO composite with different photo-irradiated time.

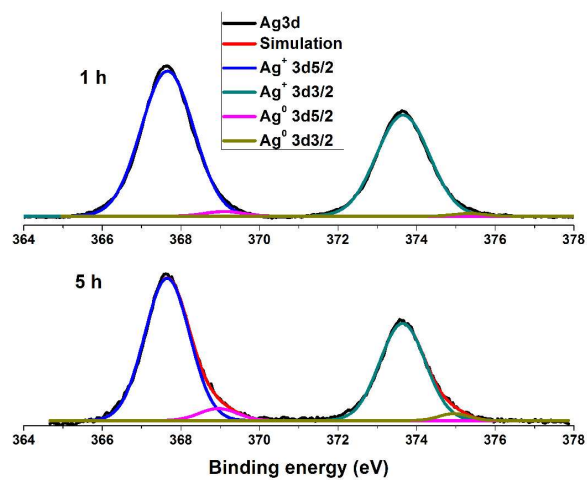

**Fig. S9.** Deconvolution of Ag (3d) XPS spectra of the Ag@Ag<sub>2</sub>Mo<sub>3</sub>O<sub>10</sub>/activated GO composite at 1 and 5 h solar irradiation time.

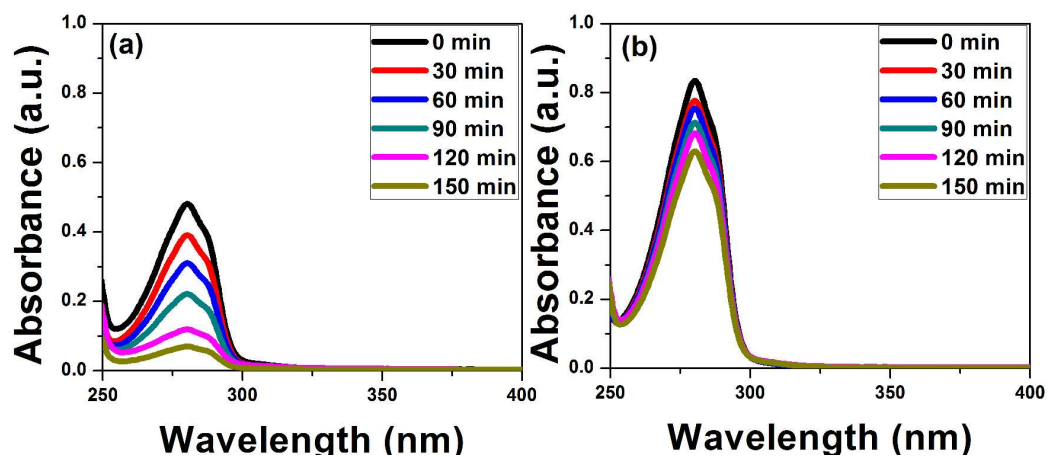

**Fig. S10.** UV absorption spectra of 4-CP over 20% Ag@Ag<sub>2</sub>Mo<sub>3</sub>O<sub>10</sub>/activated GO (a) and Ag@Ag<sub>2</sub>Mo<sub>3</sub>O<sub>10</sub> (b) under solar light irradiation as function time.

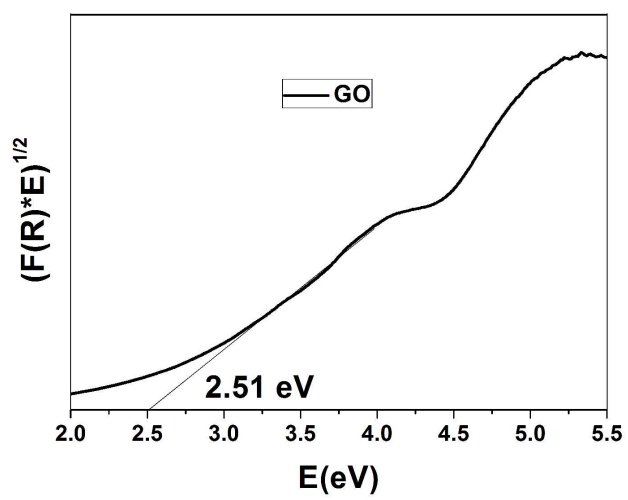

**Fig. S11.** Plots of  $(\alpha E)^{1/2}$  against the photon energy ( $E$ ) for GO.
